# Supplementary material for: Syntheses of 3-acetoacetylaminobenzo[b]furan derivatives having cysteinyl leukotriene 2 receptor antagonistic activity
Source: Royal Society of Chemistry journal article supplement (doi:10.1039/b312682j), 2004-01-01
Supplement: b312682j.doc [file b312682j.doc]

**Supplementary** **data**

**Syntheses of 3-acetoacetylaminobenzo[*b*]furan derivatives having cysteinyl leukotriene 2 receptor antagonistic activity 1)**

Kumiko Ando*a*, Eriko Tsuji*a*, Yuko Ando*a*, Noriko Kuwata*a*, Jun-ichi Kunitomo*a*, Masayuki Yamashita*b*, Shunsaku Ohta*b*, Shigekatsu Kohno*b* and Yoshitaka Ohishi,**a*

*a School of Pharmaceutical Sciences, Mukogawa-Women’s University, 11-68 Koshien Kyuban-cho, Nishinomiya 663-8179, Japan. Fax:+ 798 41 2797; Tel: +798 45 9953; E-mail: yohishi@mwu.mukogawa-u.ac.jp*

*b Kyoto Pharmaceutical University, Misasagi, Yamashinaku, Kyoto 607-8412, Japan. Fax: +75 595 4795; Tel:+ 75 595 4703; E-mail:* [*sohta@mb.kyoto-phu.ac.jp*](mailto:sohta@mb.kyoto-phu.ac.jp)*, kohno@mb.kyoto-phu.ac.jp*

**Table S-2** Yields, Melting Points, 1H-NMR Data and Mass Spectral Data of **9**

| | Compd. | Yield (%) | mp (°C) | 1H-NMR | MS *m/z*(int.) | formula HR-MS*m/z*M+ Calcd(Found) | | --- | --- | --- | --- | --- | --- | | **9a** | 74.8 | 145.0-148.0 | (CDCl3), 2.49 (3H, s, CH3), 5.58 (2H, bs, NH2), 7.23 (1H, dd, *J*=8.5, 7.8Hz, 5- or 6-H), 7.41 (1H, d, *J*=8.5Hz, 4- or 7-H), 7.48 (1H, dd, *J*=8.4, 7.9Hz, 5- or 6-H), 7.57 (1H, d, *J*=8.4Hz, 4- or 7-H) | 175(M+,100.00),  160(94.46) | C10H9NO2 175.0635 (175.0634) | | **9b** | 90.4 | 201.8-203.0 | (CDCl3), 2.49 (3H, s, CH3), 5.49 (2H, bs, NH2), 7.29 (1H, d, *J*=8.8Hz, 7-H), 7.56(1H, dd, *J*=8.8, 1.8Hz, 6-H), 7.71 (1H, d, *J*=1.8Hz, 4-H) | 253(M+,21.00), 43(100.00) | C10H8BrNO2 252.9739 (252.9734) | | **9c** | 8.9 | 242.0-244.0 | (CDCl3), 2.50 (3H, s, CH3), 5.59 (2H, bs, NH2), 7.51(1H, d, *J*=9.0Hz, 7-H), 7.73 (1H, dd, *J*=9.0, 2.0Hz, 6-H), 7.95 (1H, d, *J*=2.0Hz, 4-H) | 200(M+,81.71), 185(100.00) | C11H8N2O2 200.0586 (200.0585) | | **9d** | 49.0 | 172.3-174.4 | (acetone-*d*6), 2.32 (3H, s, COCH3) , 3.85 (3H, s, OCH3), 6.45 (2H, bs, NH2) , 6.60-7.00 (2H, m, 5-, 7-H), 7.70 (1H, d, *J*=8.0Hz, 4-H) | 205(M+,100.00), 190(63.56) | C11H11NO3 205.0741 (205.0740) | | **9e** | 87.3 | 141.9-143.4 | (CDCl3), 2.42 (3H, s, COCH3) , 4.01 (3H, s, OCH3), 6.47 (2H, bs, NH2), 7.09-7.39 (3H, m, 4-, 5-, 6-H) | 205(M+,100.00), 190(81.76) | C11H11NO3 205.0739 (205.0744) | | **9f** | 95.0 | 222.9-225.2 | (DMSO-*d*6), 7.21-7.98 (6H, m, 4-, 5-, 6-, 7-H, NH2), 8.05 (2H, d, *J*=8.0Hz, 2'-, 6'-H), 8.37 (2H, d, *J*=8.0Hz, 3'-, 5'-H) | 261(M+,100.00), 102(13.07) | C16H10N2O2 262.0742 (262.0743) | | **9g** | 76.0 | 252.8-253.5 | (CDCl3), 6.09 (2H, bs, NH2), 7.35 (1H, d, *J*=8.9Hz, 7-H), 7.64 (1H, dd, *J*=8.9, 2.0Hz, 6-H), 7.80 (1H, d, *J*=2.0Hz, 4-H), 7.80-7.84 (2H, m, 2'-, 6'-H), 8.29-8.32 (2H, m, 3'-, 5'-H) | 340(M+,79.21), 341(100.00) | C16H9BrN2O2  339.9847 (339.9845) | | **9h** | 76.7 | 262.5-266.0 | (DMSO-*d*6), 7.25 (1H, d, *J*=10.0Hz, 7-H), 8.04(2H, bs, NH2), 8.05 (2H, d, *J*=8.0Hz, 2'-, 6'-H), 8.29 (2H, d, *J*=8.0Hz, 3'-, 5'-H), 8.47 (1H, d, *J*=10.0Hz, 6-H), 9.23 (1H, d, *J*=3.0Hz, 4-H) | 306(M+,93.16), 44(100.00) | C16H9N3O4 307.0593 (307.0593) | |
| --- | --- | --- | --- | --- | --- | --- | --- | --- | --- | --- | --- | --- | --- | --- | --- | --- | --- | --- | --- | --- | --- | --- | --- | --- | --- | --- | --- | --- | --- | --- | --- | --- | --- | --- | --- | --- | --- | --- | --- | --- | --- | --- | --- | --- | --- | --- | --- | --- | --- | --- | --- | --- | --- | --- |

Cont.

**Table S-1** Yields, Melting Points, 1H-NMR Data and Mass Spectral Data of  **8**

| | Compd. | Yield (%) | mp  (°C） | 1H-NMR | MS *m/z*(int.) | formula HR-MS*m/z*M+ Calcd(Found) | | --- | --- | --- | --- | --- | --- | | **8a** | 86.4 | 85.0-86.5 | (CDCl3), 2.40 (3H, s, CH3), 4.65 (2H, s, CH2), 6.80-7.80 (4H, m, 3-, 4-, 5-, 6-H) | 175(M+,44.13), 133(100.00) | C10H9NO2 175.0633 (175.0633) | | **8b** | 96.8 | 107.0-109.0 | (CDCl3), 2.32 (3H, s, CH3), 4.60 (2H, s, CH2), 6.73 (1H, d, *J*=9.0Hz, 6-H), 7.65 (1H, dd, *J*=9.0, 1.5Hz, 5-H), 7.73 (1H, s, 3-H) | 253(M+,20.40), 211(48.31) | C24H26N2O5 252.9738 (252.9755) | | **8c** | 86.8 | 184.7-187.8 | (DMSO-*d*6), 5.90 (2H, s, CH2), 7.01-8.39 (4H, m, 3-, 4-, 5-, 6-H), 8.17 (4H, m, 2'-, 3'-, 5'-, 6'-H) | 262(M+,100.00),  130(90.49) | - | | **8d** | 92.0 | 294.0-294.5 (dec.) | (DMSO-*d*6), 6.14 (2H, s, CH2), 7.55 (1H, d, *J*=10.0Hz, 6-H), 8.04 (2H, d, *J*=8.0Hz, 2'-, 6'-H), 8.26 (2H, d, *J*=8.0Hz, 3'-, 5'-H), 8.47 (1H, d, *J*=10.0Hz, 5-H), 8.65 (1H, d, *J*=3.0Hz, 3-H) | 307(M+,58.17), 130(100.00) | - | | **8e** | 74.2 | 195.2-198.1 | (acetone-*d*6), 5.95 (2H, s, OCH2), 6.17(2H, s, -OCH2O-), 7.03 (1H, d, *J*=8.4Hz, 5'-H), 7.40 (1H, d, *J*=9.5Hz, 6-H), 7.48 (1H, d, *J*=1.8Hz, 2'-H), 7.73 (1H, dd, *J*=1.9, 2.5Hz, 6'-H), 8.45 (1H, dd, *J*=9.5, 2.9Hz, 5-H), 8.63 (1H, d, *J*=3.0Hz, 3-H) | 326 (M+,67.29),  149(100.00) | C4H11NO4 326.0539 (326.0539) | | **8f** | 48.0 | 47.0-48.0 | (CDCl3), 5.15 (2H, s, CH2), 7.15-7.90 (4H, m, 3-, 4-, 5-, 6-H) | 158(M+,95.61), 118(100.00) | - | | **8g** | 99.4 | 158.7-161.6 | (acetone-*d*6), 5.35 (2H, s, CH2), 7.41(1H, d, *J*=9.7Hz, 6-H), 7.90 (2H, m, 3-, 5-H） | 236(M+,53.94), 196(100.00) | C9H5BrN2O 237.9585 (235.9601) | | **8h** | 98.5 | 164.9-165.3 | (DMSO-*d*6), 4.68 (2H, s, CH2), 7.03-7.80 (5H, m, 3-, 4-, 5-, 6-H, NH2) | 176(M+,34.40), 104(100.00) | - | | **8i** | 86.5 | 46.8- 49.1 | (CDCl3), 1.29 (3H, t, *J*=5.0Hz, CH3), 4.30 (2H, q, *J*=5.0Hz, CH2CH3), 4.85 (2H, s, OCH2CO), 6.80-7.85 (4H, m, 3-, 4-, 5-, 6-H) | 205(M+,34.54), 132(100.00) | C11H11NO3 205.0737 (205.0739) | | **8j** | 57.8 | 64.8-67.6 | (CDCl3), 1.28 (3H, t, *J*=6.0Hz, CH3), 4.28 (2H, q, *J*=6.0Hz, CH2CH3), 5.01 (2H, s, OCH2CO), 7.20 (1H, d, *J*=9.0Hz, 6-H), 7.84 (1H, dd, *J*=9.0, 3.0Hz, 5-H), 7.92 (1H, d, *J*=2.0Hz, 3-H) | 285(M+,100.00), 212(54.09) | C11H10BrNO3 282.9844 (282.9844 ) | |
| --- | --- | --- | --- | --- | --- | --- | --- | --- | --- | --- | --- | --- | --- | --- | --- | --- | --- | --- | --- | --- | --- | --- | --- | --- | --- | --- | --- | --- | --- | --- | --- | --- | --- | --- | --- | --- | --- | --- | --- | --- | --- | --- | --- | --- | --- | --- | --- | --- | --- | --- | --- | --- | --- | --- | --- | --- | --- | --- | --- | --- | --- | --- | --- | --- | --- | --- |

| | **9i** | 62.0 | 216.3-219.0 | (acetone-*d*6), 7.50 (1H, d, *J*=9.2Hz, 7-H), 7.58 (2H, dd, *J*=8.8, 2.4Hz, 3'-, 5'-H), 7.70 (1H, dd, *J*=8.8, 2.4Hz, 6-H), 8.21 (1H, d, *J*=1.8Hz, 4-H), 8.24 (2H, dd, *J*=8.8, 2.4Hz, 2'-, 6'-H) | 220(M+,100.00), 205(66.3) | C15H9BrClNO2 348.9505 (348.9510) | | --- | --- | --- | --- | --- | --- | | **9j** | 20.0 | 261.0-263.7 | (DMSO-*d*6), 7.59 (2H, dd, *J*=10.0, 3.0Hz, 3'-, 5'-H), 7.72 (1H, s, 7-H), 8.15 (2H, dd, *J*=10.0, 3.0Hz, 2'-, 6'-H), 8.40 (1H, dd, *J*=10.0, 3.0Hz, 6-H), 9.14 (1H, d, *J*=3.0Hz, 4-H) | 315(M+,100.00), 265(48.6) | C15H9ClN2O4 316.0251 (316.0256) | | **9k** | 70.0 | 205.6-206.2 | (DMSO-*d*6), 3.96 (3H, s, OCH3), 5.90 (1H, bs, NH), 7.22-8.07 (7H, m, 4-, 5-, 6-, 7-H) | 301(M+,91.72), 300(100.00) | C16H12ClNO3 301.0506 (301.0502) | | **9l** | 34.0 | 208.9-211.5 | (CDCl3), 4.02 (3H, s, CH3), 5.93-6.01 (2H, bs, NH2), 6.97-7.02 (1H, m, 6-H), 7.18 (1H, d, *J*=10.0Hz, 5-H), 7.18 (1H, d, *J*=5.8Hz, 4-H), 7.66 (2H, dd, *J*=8.4, 2.7Hz, 3'-, 5'-H), 8.16 (2H, dd, *J*=8.7, 1.8Hz, 2'-, 6'-H) | 346(M+,100.00), 331(12.50) | C16H12BrNO3 345.0001 (345.0004) | | **9m** | 90.8 | 172.3-174.4 | (DMSO-*d*6), 6.12 (2H, s, OCH2O), 7.05 (1H, d*, J*=8.8Hz, 5-H), 7.54 (2H, bs, NH2), 7.50-7.90 (3H, m, 2'-, 5'-, 6'-H), 8.38 (1H, dd, *J*=8.8, 2.0Hz, 6-H), 9.13 (1H, d, *J*=2.0Hz, 4-H) | 326(M+,58.52), 325(100.00) | C10H14N2O6 326.0539 (326.0537) | | **9n** | 65.0 | 161.8-163.5 | (acetone-*d*6), 5.90 (2H, bs, NH2), 7.12-8.06 (4H, m, 4-, 5-, 6-, 7-H) | 158(M+,100.00),  129(25.43) | C9H6N2O 158.0480 (158.0485) | | **9o** | 50.5 | 185.2-187.6 | (acetone-*d*6), 5.98 (2H, s, NH2), 7.58 (2H, m, 6-, 7-H), 8.08 (1H, s, 4-H) | 238(100.00),  209(15.01) | C9H5BrN2O235.9585 (235.9590) | | **9p** | 76.9 | 151.3-152.4 | (DMSO-*d*6), 6.47 (2H, bs, NH2), 7.09-7.39 (4H, m, 4-, 5-, 6-, 7-H) | 176(M+,100.00), 159(42.02) | C9H8N2O2 176.0586 (176.0590) | | **9q** | 74.8 | 81.2-82.3 | (CDCl3), 1.44 (3H, t, *J*=7.5Hz, CH3), 4.44(2H, q, *J*=7.5Hz, CH2), 4.95(2H, s, NH2), 7.22-7.55 (4H, m, 4-, 5-, 6-, 7-H) | 205(M+,100.00), 177(33.13) | C11H11NO3 205.0739 (205.0735) | | **9r** | 58.2 | 160.5-162.6 | (CDCl3), 1.43 (3H, t, *J*=7.0Hz, CH3), 4.44 (2H, q, *J*=7.0Hz, CH2), 5.29 (2H, s, NH2), 7.33 (1H, d, *J*=8.8Hz, 7-H), 7.53 (1H, dd, *J*=8.8, 1.8Hz, 6-H), 7.69 (1H, d, *J*=1.8Hz, 4-H) | 285(100.00),  255(29.50) | C11H10BrNO3 282.9844 (282.9844) | | **9s** | 23.1 | 284.5-286.5 (dec.) | (acetone-*d*6), 7.44 (2H, bs, NH2), 7.54 (1H, d, *J*=9.5Hz, 7-H), 7.83 (1H, d, *J*=8.8Hz, 6-H), 8.32 (1H, d, *J*=2.2Hz, 4-H) | 256(M+,100.00), 226(76.75) | C8H5BrN2O3 255.9484 (255.9485) | | **9t** | 27.3 | 190.3-193.4 | (acetone-*d*6), 1.46 (3H, t, *J*=6.9Hz, CH3), 4.29 (2H, q, *J*=7.0Hz, CH2), 7.25 (1H, dd, *J*=7.7, 1.8Hz, 6-H), 7.28 (1H, m, 5-H), 7.43 (2H, bs, NH2), 7.60 (1H, dd, *J*=7.3, 1.5Hz, 4-H) | 222(M+,100.00), 194(27.28) | C10H10N2O4 222.0641 (222.0630) | |
| --- | --- | --- | --- | --- | --- | --- | --- | --- | --- | --- | --- | --- | --- | --- | --- | --- | --- | --- | --- | --- | --- | --- | --- | --- | --- | --- | --- | --- | --- | --- | --- | --- | --- | --- | --- | --- | --- | --- | --- | --- | --- | --- | --- | --- | --- | --- | --- | --- | --- | --- | --- | --- | --- | --- | --- | --- | --- | --- | --- | --- | --- | --- | --- | --- | --- | --- | --- | --- | --- | --- | --- | --- |

**Table S-3** Yields, Melting Points, 1H-NMR Data and Mass Spectral Data of  **10**

| | Compd. | Yield  (%) | mp  (°C ） | 1H-NMR | MS *m/z*(int.) | | --- | --- | --- | --- | --- | | **10a** | 56.8 | colorless oil | (CDCl3), 1.16 (6H, t, *J*=6.5Hz, CH2CH3×2), 1.90 (3H, dd, *J*=6.5, 1.7Hz, CH3), 3.45 (4H, q, *J*=6.0Hz, CH2CH3×2), 6.22 (1H, dd, *J*=15.0, 1.7Hz, CH3CH=CH), 6.91 (1H, m, CH3CH=CH) | - | | **10b** | 96.0 | 76.8-79.1 | (CDCl3), 1.82 (3H, dd, *J*=8.0, 2.0Hz, CH3), 2.78 (2H, t, CH2CH2N), 3.50 (2H, m, CH2CH2NH), 3.82 (6H, s, OCH3×2), 5.93 (1H, dd, *J*=16.0, 2.0Hz, CH=CHCH3), 6.75 (1H, m, CH=CHCH3), 6.85 (3H, s, arom-H) | 249(M+,35.46), 164(100.00) | | **10c** | 39.2 | 262.0-265.0 | (acetone-*d*6), 1.32(3H, t, *J*=8.0Hz, CH2CH3), 1.90(3H, dd, *J*=6.0, 2.0Hz, CH3CH), 3.98 (3H, s, OCH3), 4.35 (2H, q, *J*=8.0Hz, CH2CH3), 6.32 (1H, dd, *J*=16.0, 2.0Hz, CH3C=CH), 6.84 (1H, dd, *J*=16.0, 7.0Hz, CH3CH), 7.18 (1H, d, *J*=8.8Hz, 2-H), 8.87 (1H, dd, *J*=8.8, 2.2Hz, 3-H), 8.60 (1H, bs, NH), 9.19 (1H, d, *J*=2.2Hz, 5-H) | 253(M+,62.30), 167(100.00) | | **10d** | 93.7 | 55.8-58.0 | (CDCl3), 1.81 (3H, d, *J*=6.0Hz, CH3), 3.55 (8H, bs, CH2×4), 6.20-7.09 (2H, m, CH=CH) | 155(M+,61.77), 140(100.00) | | **10e** | 69.0 | 124.3-125.4 | (CDCl3), 1.90 (3H, dd, *J*=6.6, 1.8Hz, CH3), 3.17-3.19, 3.70-3.86 (8H, m, CH2×4), 6.29 (1H, dd, *J*=15.0, 1.8Hz, CH3CH), 6.86-6.95, 7.26-7.30 (6H, m, arom-H, CHCO) | 230(M+,22.30), 132(100.00) | | **10f** | 90.0 | 79.6-81.2 | (CDCl3), 1.81 (3H, d, *J*=6.0Hz, CH3), 2.40-3.59 (8H, m, piperazine-CH2×4), 3.53 (2H, s, CH2), 6.50-6.90 (2H, m, CH=CH), 7.40 (5H, s, arom-H) | 244(M+,48.83), 91(100.00) | |
| --- | --- | --- | --- | --- | --- | --- | --- | --- | --- | --- | --- | --- | --- | --- | --- | --- | --- | --- | --- | --- | --- | --- | --- | --- | --- | --- | --- | --- | --- | --- | --- | --- | --- | --- | --- |

**Table S-4** Yields, Melting Points, 1H-NMR Data and Mass Spectral Data of **12**

| | Compd. | Yield  (%) | mp  (°C ） | 1H-NMR | MS *m/z*(int.) | formula HR-MS*m/z*M+ Calcd(Found) | | --- | --- | --- | --- | --- | --- | | **12a** | 50.2 | 168.9-172.4 | (CDCl3) 1.20 (6H, m, CH2CH3×2), 2.35 (3H, d, *J*=1.1Hz, C=C-CH3), 2.50 (3H, s, COCH3), 3.38-3.52 (4H, m, CH2CH3×2), 5.61 (2H, bs, NH2), 6.30 (1H, q, *J*=1.1Hz, C=C-H), 7.38 (1H, d, *J*=8.4Hz, 7-H), 7.58 (1H, dd, *J*=8.4, 1.5Hz, 6-H), 7.62 (1H, d, *J*=1.5Hz, 4-H) | 314(M+,100.00),299(25.92) | C18H22N2O3 314.1630 (314.1634) | | **12b** | 26.0 | 168.0-173.0 | (DMSO-*d*6), 2.37 (3H, s, COCH3), 2.52 (3H, d, *J*=1.1Hz, C=C-CH3), 2.70 (2H, t, *J*=6.9Hz, CH2CH2N), 3.35 (2H, m, CH2CH2NH), 3.72 (3H, s, OCH3), 3.75 (3H, s, OCH3), 6.23 (1H, d, *J*=1.1Hz, C=C-H), 6.74 (1H, dd, *J*=8.1, 1.8Hz, 6'-H), 6.83 (1H, d, *J*=1.8Hz, 2'-H), 6.87 (1H, d, *J*=8.5Hz, 5'-H), 6.92 (1H, bs, NH2), 7.50 (1H, d, *J*=8.8Hz, 7-H), 7.65 (1H, dd, *J*=8.8, 2.2Hz, 6-H), 8.01 (1H, t, *J*=5.9Hz, NHCO), 8.15 (1H, d, *J*=1.8Hz, 4-H) | 422(M+,38.08),  164(100.00) | C24H26N2O5 422.1842 (422.1838) | | **12c** | 28.2 | 189.0-193.0 | (CDCl3), 1.40 (3H, t, *J*=7.2Hz, CH2CH3), 2.51 (3H, s, COCH3), 2.70 (3H, bs, C=C-CH3), 3.95 (3H, s, OCH3), 4.38 (2H, q, *J*=7.2Hz, CH2), 5.66 (2H, bs, NH2), 6.22 (1H, bs, C=C-H), 6.92 (1H, d, *J*=8.8Hz, 3'-H), 7.41 (1H, d, *J*=8.8Hz, 7-H), 7.63 (1H, dd*, J*=8.8, 1.8Hz, 6-H),7.71 (1H, bs, 4-H), 7.82 (1H, dd, *J*=8.8, 1.8Hz, 4'-H),7.81 (1H, bs, 6'-H), 9.11 (1H, bs, NH) | 436(M+,88.78), 242(100.00) | C24H24N2O6 436.1636 (436.1634) | | **12d** | 31.3 | 254.9-259.0 | (CDCl3), 2.34 (3H, d, *J* =1.1Hz, C=C-CH3), 2.49 (3H, s, COCH3), 3.57-3.73 (8H, m, CH2×2), 5.62 (2H, bs, NH2), 6.26 (1H, q, *J*=1.1Hz, C=C-H), 7.38 (1H, dd, *J*=8.8, 0.72Hz, 7-H), 7.58 (1H, dd, *J*=8.8, 1.8Hz, 6-H), 7.61 (1H, dd, *J*=1.8, 0.72Hz, 4-H) | 328(M+,100.00), 242(97.09) | C18H20N2O4 328.1423 (328.1422) | | **12e** | 35.0 | 158.6-160.7 | (CDCl3), 2.34 (3H, d, *J*=1.1Hz, C=C-CH3), 2.50 (3H, s, COCH3), 3.20 (4H, m, CH2×2), 3.73-3.89 (4H, m, CH2×2), 5.64 (2H, bs, NH2), 6.32 (1H, q, *J*=1.1Hz, C=C-H), 6.91-7.31 (5H, m, arom-H), 7.39 (1H, d, *J*=8.8Hz, 7-H), 7.60 (1H, dd, *J*=8.8, 1.5Hz, 6-H), 7.66 (1H, d, *J*=1.5Hz, 4-H) | 403(M+,63.62), 132(100.00) | C24H25N3O3 403.1896 (403.1895) | | **12f** | 30.4 | 149.8-152.4 | (CDCl3), 2.30 (3H, d, *J*=1.1Hz, C=C-CH3), 2.44-2.49 (4H, m, CH2×2), 2.49 (3H, s, COCH3), 3.54 (2H, s, CH2), 3.56-3.73 (4H, m, CH2×2), 5.58 (2H, bs, NH2), 6.26 (1H, q, *J*=1.1Hz, C=C-H), 7.25-7.32 (5H, m, arom-H), 7.37 (1H, d, *J*=8.8Hz, 7-H), 7.58 (1H, dd, *J*=8.8, 1.5Hz, 6-H), 7.61 (1H, d, *J*=1.5Hz, 4-H), | 417(M+,46.81), 44(100.00) | C25H27N3O3 417.2052 (417.2050) | | **12g** | 40.9 | 216.4-218.4 | (CDCl3), 1.20 (6H, m, CH2CH3×2), 2.35 (3H, d, *J*=1.1Hz, C=C-CH3), 3.47 (4H, m, CH2CH3×2), 6.23 (2H, bs, NH2), 6.33 (1H, q, *J*=1.1Hz, C=C-H), 7.42 (1H, d, *J*=8.8Hz, 7-H), 7.65 (1H, dd, *J*=8.8, 1.9Hz, 6-H), 7.71 (1H, d, *J*=1.9Hz, 4-H), 7.80-7.82 (2H, m, 2'-, 6'-H), 8.30-8.33 (2H, m, 3'-, 5'-H) | 401(M+,100.00), 386(31.98) | C24H23N3O3 401.1739 (401.1734) | | **12h** | 38.8 | 259.0-261.2 | (CDCl3), 2.61 (3H, d, *J*=1.1Hz, C=C-CH3), 2.84 (2H, t, *J*=6.9Hz, CH2CH2N), 3.62 (2H, m, CH2CH2NH), 3.86 (3H, s, OCH3), 3.89 (3H, s, OCH3), 5.52 (1H, bt, *J*=5.9Hz, NHCO), 5.96 (1H, d, *J*=1.1Hz, C=C-H), 6.14 (1H, bs, NH2), 6.76 (1H, bs, 6"-H), 6.77 (1H, dd, *J*=7.4, 2.1Hz, 2"-H), 6.83 (1H, d, *J*=8.4Hz, 5"-H), 7.42 (1H, d, *J*=8.8Hz, 7-H), 7.61 (1H, dd, *J*=8.8, 1.8Hz, 6-H), 7.66 (1H, d, *J*= 1.4Hz, 4-H), 7.81 (2H, m, 2'-, 6'-H), 8.31 (2H, m, 3'-, 5'-H) | 509(M+,6.14), 164(100.00) | C30H27N3O5 509.1951 (509.1952) | | **12i** | 16.9 | 232.6-235.5 | (CDCl3), 2.35 (3H, d, *J*=1.1Hz, C=C-CH3), 3.58-3.74 (8H, m, CH2×4), 6.22 (2H, bs, NH2), 6.28 (1H, q, *J*=1.1Hz, C=C-H), 7.43 (1H, d, *J*=8.7Hz, 7-H), 7.65 (1H, dd, *J*=8.8, 1.8Hz, 6-H), 7.72 (1H, d, *J*=1.4Hz, 4-H), 7.80 (2H, m, 2'-, 6'-H ), 8.31 (2H, m, 3'-, 5'-H) | 415(M+,29.91), 44(100.00) | C24H21N3O4 415.1532 (415.1529) | | **12j** | 36.4 | 259.5-262.0 | (CDCl3), 1.19 (6H, t, *J*=7.40Hz, NCH2CH3×2), 1.44 (3H, t, *J*=7.4Hz, OCH2CH3), 2.35 (3H, s, C=C-CH3), 3.40 (2H, q, *J*=7.4Hz, NCH2CH3), 3.48 (2H, q, *J*=7.4Hz, NCH2CH3), 4.45 (2H, q, *J*=7.4Hz, OCH2), 5.01 (2H, bs, NH2), 6.30 (1H, s, C=C-H), 7.42 (1H, d, *J*=8.7Hz, 7-H), 7.54 (1H, dd, *J*=8.7, 1.8Hz, 6-H), 7.60 (1H, d, *J*=1.8Hz, 4-H) | 344(M+,100.00), 329(31.90) | C19H24N4O2 344.1736 (344.1736) | |
| --- | --- | --- | --- | --- | --- | --- | --- | --- | --- | --- | --- | --- | --- | --- | --- | --- | --- | --- | --- | --- | --- | --- | --- | --- | --- | --- | --- | --- | --- | --- | --- | --- | --- | --- | --- | --- | --- | --- | --- | --- | --- | --- | --- | --- | --- | --- | --- | --- | --- | --- | --- | --- | --- | --- | --- | --- | --- | --- | --- | --- | --- | --- | --- | --- | --- | --- |

**Table S-5** Yields, Melting Points, 1H-NMR Data and Mass Spectral Data of **14**

| | Compd. | Yield (%) | mp  (°C ） | 1H-NMR | MS *m/z*(int.) | formula HR-MS*m/z*M+ Calcd(Found) or Analysis Calcd(Found) | | --- | --- | --- | --- | --- | --- | | **14a** | 36.6 | 179.0-181.0 | (CDCl3), 2.64 (3H, s, CH3), 2.85 (3H, s, COCH3), 7.33 (1H, d, *J*=8.2Hz, 5- or 6-H), 7.49 (1H, d, *J*=8.5Hz, 7-H), 7.55 (1H, d, *J*=8.4Hz, 5- or 6-H), 8.62 (1H, d, *J*=8.8Hz, 4-H), 8.64 (1H, s, isoxazole-H), 10.87 (1H, bs, NH) | 284(M+,77.90), 175 (100.00) | C15H12N2O4 284.0794 (284.0794) | | **14b** | 68.0 | 206.0-208.0 | (CDCl3), 2.64 (3H, s, CH3), 2.86 (3H, s, COCH3), 7.38 (1H, d, *J*=9.1Hz, 7-H), 7.64 (1H, dd, *J*=9.1, 2.2Hz, 6-H), 8.63 (1H, s, isoxazole-H), 8.84 (1H, d, *J*=2.2Hz, 4-H), 10.80 (1H, bs, NH) | 362(M+,57.82), 253(100.00) | C15H11BrN2O4 361.9902 (361.9914) | | **14c** | 13.7 | 119.8-202.0 | (CDCl3), 2.66 (3H, s, CH3), 2.87 (3H, s, COCH3), 7.62 (1H, dd, *J*=8.8, 0.8Hz, 7-H), 7.77 (1H, dd, *J*=8.8, 1.8Hz, 6-H), 8.63 (1H, s, isoxazole-H), 9.16 (1H, dd, *J*=1.8, 0.70Hz, 4-H), 10.84 (1H, bs, NH) | 309(M+,46.17), 200(100.00) | C16H11N4O3 309.0745 (309.0747) | | **14d** | 78.3 | 168.2-170.1 | (CDCl3), 2.58 (3H, s, CH3), 2.84 (3H, s, COCH3), 3.89 (3H, s, OCH3), 6.89-7.00 (2H, m, 5-, 7-H), 8.55 (1H, s, 4-H), 8.64 (1H, s, isoxazole-H), 11.03 (1H, bs, NH) | 314(M+,68.71), 205(100.00) | C16H14N2O5 314.0903 (314.0905) | | **14e** | 81.9 | 181.0-181.7 | (CDCl3), 2.65 (3H, s, CH3), 2.83 (3H, s, COCH3), 4.01 (3H, s, OCH3), 6.92-7.37 (2H, m, 5-, 6-H), 8.15 (1H, d, *J*=8.5Hz, 4-H), 8.61 (1H, s, isoxazole-H), 10.77 (1H, bs, NH) | 314(M+,84.51), 205(100.00) | C16H14N2O5 314.0903 (314.0904) | | **14f** | 49.6 | 235.5-237.8 | (CDCl3), 2.63 (3H, s, CH3), 7.44 (1H, ddd, *J*=6.4, 6.0, 1.1Hz, 5- or 6-H), 7.65 (1H, ddd, *J*=6.4, 6.0, 1.1Hz, 5- or 6-H), 7.76 (1H, d, *J*=6.8Hz, 7-H), 8.02 (2H, m, 2'-, 6'-H), 8.04 (1H, dd, *J*=5.8, 0.7Hz, 4-H), 8.10 (2H, m, 3'-, 5'-H), 9.00 (1-H, s, isoxazole-H), 10.64 (1-H, s, NH) | 371(M+,58.86), 262(100.00) | C12H13N3O4 371.0906 (371.0909) | | **14g** | 34.0 | 236.3-238.9 | (CDCl3), 2.90 (3H, s, CH3), 7.42 (1H, d, *J*=9.1Hz, 7-H), 7.70 (1H, dd, *J*=9.1, 1.9Hz, 6-H), 7.86-7.88 (2H, m, 2'-, 6'-H), 8.32-8.35 (2H, m, 3'-, 5'-H), 8.71 (1H, s, isoxazole-H), 8.91 (1H, d, *J*=1.9Hz, 4-H), 11.30 (1H, bs, NH) | 449(M+,56.56), 341(100.00) | C21H12BrN3O4 449.0001 (449.0002) | | **14h** | 71.9 | 240.8-243.2 | (CDCl3), 2.90 (3H, s, CH3), 7.43 (1H, d, *J*=8.9Hz, 7-H), 7.56 (2H, dd, *J*=6.7, 2.0Hz, 3'-, 5'-H), 7.68 (1H, dd, *J*=8.9, 2.0Hz, 6-H), 8.23 (2H, dd, *J*=6.7, 2.0Hz, 2'-, 6'-H), 8.72 (1H, s, isoxazole-H), 8.87 (1H, d, *J*=1.6Hz, 4-H), 11.39 (1H, s, NH) | 458(M+,35.83), 350(100.00) | C20H12BrClN2O4 457.9669 (457.9686) | | **14i** | 37.9 | 237.4-239.5 | (CDCl3), 2.67 (0.46H, s, isoxazole-CH3), 2.87 (2.48H, s, isoxazole-CH3), 4.02 (3H, s, OCH3), 7.04 (1H, dd, *J*=8.1, 0.7Hz, 6-H), 7.27 (1H, dd, *J*=8.0, 8.0Hz, 5-H), 7.55 (2H, m, 3'-, 5'-H), 8.15 (0.15H, dd, *J*=8.0, 0.7Hz, 4-H), 8.19 (0.81H, dd, *J*=8.0, 0.8Hz, 4-H), 8.26 (2H, m, 2', 6'-H), 8.71 (0.81H, s, isoxazole-H), 9.05 (0.15H, s, isoxazole-H), 11.34, 11.37 (1H, bs, NH) | 410(M+,25.2), 43(100.00) | C21H15ClN2O5 410.0669 (410.0064) | | **14j** | 65.0 | 241.5-244.4 | (CDCl3), 2.91 (3H, s, CH3), 4.07 (3H, s, OCH3), 7.12-8.77 (8H, m, arom-H), 11.44 (1H, s, NH) | 454(M+,32.63), 346(100.00) | C21H15BrN2O5 454.0164 (454.0163) | | **14k** | 90.9 | 227.3-230.4 | (DMSO-*d*6), 2.73 (3H, s, CH3), 7.66-8.15 (4H, m, 4-, 5-, 6-, 7-H), 9.19 (1H, s, isoxazole-H), 10.88 (1H, s, NH) | 267(M+,9.2), 43(100.00） | C14H9N3O3 267.0633 (267.0633) | | **14l** | 96.6 | 239.2-241.9 | (DMSO-*d*6), 2.73 (3H, s, CH3), 7.70-7.80 (2H, m, 6-, 7-H), 8.34 (1H, d, *J=*2.2Hz, 4-H), 9.16 (1H, s, isoxazole-H), 10.79 (1H, s, NH) | 345(M+,4.50), 43(100.00) | C14H8BrN3O3 344.9749 (344.9749) | | **14m** | 80.7 | 250.9-252.6 | (DMSO-*d*6), 2.77 (3H, s, CH3), 7.55-8.02 (6H, m, 4-, 5-, 6-, 7-H, CONH2), 9.06 (1H, s, isoxazole-H), 10.59 (1H, bs, NHCO) | 285(M+,100.00), 242(10.86) | C14H11N3O4 285.0750 (285.0749) | | **14n** | 65.0 | 167.5-170.9 | (CDCl3), 1.45 (3H, t, *J*=7.0Hz, CH2CH3), 2.75 (3H, s, CH3), 4.45 (2H, q, *J*=7.0Hz, CH2CH3), 7.20-7.80 (3H, m, 5-, 6-, 7-H), 8.40 (1H, dd, *J*=8.0, 2.0Hz, 4-H), 8.50 (1H, s, isoxazole-H),10.0 (1H, bs, NH) | 314(M+,75.76), 205(100.00) | C16H14N2O5 314.0902 (314.0903) | | **14o** | 22.0 | 171.2-172.3 | (CDCl3), 1.48 (3H, t, *J*=7.3Hz, CH2CH3), 2.85 (3H, s, CH3), 4.51 (2H, q, *J*=7.3Hz, CH2CH3), 7.40 (1H, d, *J*=8.8Hz, 7-H), 7.60 (1H, dd, *J*=9.0, 1.8Hz, 6-H), 8.59 (1H, s, isoxazole-H), 8.72 (1H, d, *J*=1.8Hz, 4-H), 9.98 (1H, s, NH) | 392(M+,76.39), 283(100.00) | C16H13BrN2O5 392.0008 (392.0015) | | **14q** | 73.0 | 173.0-174.1 | (CDCl3), 1.21 (6H, t, *J*=7.2Hz, CH2CH3×2), 2.39 (3H, d, *J*=1.1Hz, C=C-CH3), 2.64 (3H, s, isoxazole-CH3), 2.86 (3H, s, COCH3), 3.41-3.35 (4H, m, CH2CH3×2), 6.37 (1H, d, *J*=1.1Hz, C=C-H), 7.47 (1H, d, *J*=8.8Hz, 7-H), 7.65 (1H, dd, *J*=8.8, 2.2Hz, 6-H), 8.64 (1H, s, isoxazole-H), 8.76 (1H, *J*=2.2Hz. 4-H), 10.86 (1H, bs, CONH) | 423(M+,45.41), 314(100.00) | C15H29BrNO5 423.1794 (423.1794)  Cont. | |
| --- | --- | --- | --- | --- | --- | --- | --- | --- | --- | --- | --- | --- | --- | --- | --- | --- | --- | --- | --- | --- | --- | --- | --- | --- | --- | --- | --- | --- | --- | --- | --- | --- | --- | --- | --- | --- | --- | --- | --- | --- | --- | --- | --- | --- | --- | --- | --- | --- | --- | --- | --- | --- | --- | --- | --- | --- | --- | --- | --- | --- | --- | --- | --- | --- | --- | --- | --- | --- | --- | --- | --- | --- | --- | --- | --- | --- | --- | --- | --- | --- | --- | --- | --- | --- | --- | --- | --- | --- | --- | --- | --- | --- | --- | --- | --- | --- | --- | --- | --- | --- | --- | --- |

| | **14r** | 12.0 | 158.0-160.0 | (CDCl3), 2.62 (3H, d, *J*=1.0Hz, C=C-CH3), 2.63 (3H, s, isoxazole-CH3), 2.84 (2H, t, *J*=7.0Hz, NCH2CH2), 2.86 (3H, s, COCH3), 3.61 (2H, q, *J*=6.9Hz, NHCH2CH2), 3.85 (3H, s, OCH3), 3.87 (3H, s, OCH3), 5.60 (1H, bt, *J*=5.9Hz, CONHCH2), 6.00 (1H, d, *J*=1.1Hz, C=C-H), 6.75-6.83 (3H, m, arom-H), 7.54 (1H, d, *J*=8.8Hz, 7-H), 7.61 (1H, dd, *J*=8.8, 2.4Hz, 6-H), 8.64 (1H, s, isoxazole-H), 8.69 (1H, d, *J*=1.4Hz, 4-H), 10.80 (1H, bs, NHCO-isoxazole) | 531(M+,1.75), 164(100.00) | C24H26N2O5 501.2005 (501.2000) | | --- | --- | --- | --- | --- | --- | | **14s** | 15.0 | 188.1-191.3 | (CDCl3), 2.38 (3H, d, *J*=1.1Hz, C=C-CH3), 2.64 (3H, s, isoxazole-CH3), 2.86 (3H, s, COCH3), 3.57-3.73 (8H, m, CH2×4), 6.31 (1H, d, *J*=1.1Hz, C=C-H), 7.47 (1H, d, *J*=8.8Hz, 7-H), 7.65 (1H, dd, *J*=8.8, 1.8Hz, 6-H), 8.63 (1H, s, isoxazole-H), 8.75 (1H, d, *J*=1.8Hz, 4-H), 10.86 (1H, bs, NH) | 437(M+,24.80), 242(100.00) | C23H23N3O6 437.1587 (437.1588) | | **14t** | 41.7 | 201.5-204.4 | (CDCl3), 2.35 (3H, d, *J*=1.1Hz, C=C-CH3), 2.66 (3H, s, isoxazole-CH3), 2.86 (3H, s, COCH3), 2.90-3.23 (4H, m, CH2×2), 3.74-3.89 (8H, m, CH2×４), 6.38 (1H, d, *J*=1.1Hz, C=C-H), 6.89-6.95, 7.26-7.31 (5H, m, arom-H), 7.48 (1H, d, *J*=8.8Hz, 7-H), 7.68 (1H, dd, *J*=8.8, 1.8Hz, 6-H), 8.65 (1H, s, isoxazole-H), 8.77 (1H, d, *J*=1.8Hz, 4-H), 10.87 (1H, bs, NH) | 512(M+,32.98), 132(100.00) | C29H28N4O5 512.2060 (512.2057) | | **14u** | 70.8 | 202.6-205.5 | (CDCl3), 1.22 (6H, t, *J*=7.3Hz, CH2CH3×2), 2.40 (3H, d, *J*=1.5Hz, C=C-CH3), 2.89 (3H, s, isoxazole-CH3), 3.42-3.54 (4H, m, CH2CH3×2), 6.40 (1H, q, *J*=1.5Hz, C=C-H), 7.52 (1H, d, *J*=8.8Hz, 7-H), 7.72 (1H, dd, *J*=8.8, 2.1Hz, 6-H), 7.86-7.89 (2H, m, 2'-, 6'-H), 8.33-8.37 (2H, m, 3'-, 5'-H),　8.72 (1H, s, isoxazole-H), 8.33 (1H, d, *J*=1.5Hz, 4-H), 11.39 (1H, bs, NH) | 510(M+,0.27), 130(100.00) | C29H26N4O5 510.1903 (510.1011) | | **14v** | 90.0 | 162.6-165.5 | (DMSO-*d*6), 2.55 (3H, s, C=C-CH3), 2.63 (3H, s, isoxazole-CH3), 2.70 (2H, t, *J*=7.3Hz, CH2CH2N), 3.33 (2H, m, CH2CH2NH), 3.71 (3H, s, OCH3), 3.74 (3H, s, OCH3), 6.26 (1H, q, *J*=1.1Hz, C=C-H), 6.74 (1H, dd, *J*=8.1, 1.8Hz, 5"-H), 6.83 (1H, d, *J*=1.8Hz, 2"-H), 6.86 (1H, d, *J*=8.0Hz, 6"-H,) 7.66 (1H, dd, *J*=8.8, 1.4Hz, 6-H), 7.79 (1H, d, *J*=8.8Hz, 7-H), 8.01-8.10 (4H, m, 2'-, 3'-, 5'-, 6'-H), 8.11 (1H, s, 4-H), 9.03 (1H, s, isoxazole-H), 10.65 (1H, bs, NHCO) | 509(6.05), 164(100.00) | C35H30N4O7 C;67.95(67.83),H;4.89(4.84), N;9.06 (9.00) | | **14w** | 16.5 | 229.4-232.5 | (CDCl3), 2.27 (3H, s, C=C-CH3), 2.61 (3H, s, isoxazole-CH3), 3.54-3.59 (8H, m, CH2×４), 6.51 (1H, q, *J*=1.1Hz, C=C-H), 7.76 (1H, d, *J*=8.8Hz, 7-H), 7.86 (1H, dd, *J*=8.8, 1.8Hz, 6-H), 8.00-8.03 (2H, m, 2'-, 6'-H), 8.08-8.10 (2H, m , 3'-, 5'-H), 8.15 (1H, d, *J*=1.9Hz, 4-H), 9.01 (1H, s, isoxazole-H), 10.62 (1H, bs, NH) | 524(M+,2.17), 130(100.00) | C29H24N4O6 524.1696 (524.1699) | | **14x** | 78.6 | 138.9-141.2 | (CDCl3), 1.21 (6H, t, *J*=7.0Hz, NCH2CH3×2), 1.48 (3H, t, *J*=7.0Hz, OCH2CH3), 2.39 (3H, d, *J*=1.1Hz, C=C-CH3), 2.85 (3H, s, isoxazole-CH3), 3.40-3.52 (4H, m, NCH2CH3×2), 4.51 (2H, q, *J*=7.3Hz, OCH2CH3), 6.36 (1H, d, *J*=1.1Hz, C=C-H), 7.49 (1H, d, *J*=8.8Hz, 7-H), 7.62 (1H, dd, *J*=8.8, 2.2Hz, 6-H), 8.60 (1H, s, isoxazole-H), 8.63 (1H, d, *J*=1.5Hz, 4-H), 10.03 (1H, s, NH) | 453(M+,22.01), 43(100.00) | C24H27N3O6 453.1900 (453.1902) | | **14y** | 44.0 | 237.5-239.1 | (CDCl3), 2.59 (3H, d, *J*=1.0Hz, C=C-CH3), 2.84 (2H, t, *J*=6.7Hz, NHCH2CH2), 2.88 (3H, s, isoxazole-CH3), 3.63 (2H, q, *J*=6.7Hz, NHCH2CH2), 3.84 (3H, s, OCH3), 3.88 (3H, s, OCH3), 4.02 (3H, s, 7-OCH3), 5.59 (1H, t, *J*=5.9Hz, CONH), 6.04 (1H, d, *J*=1.0Hz, C=C-H), 6.76 (1H, d, *J*=1.6Hz, 2"-H), 6.77 (1H, dd, *J*=9.3, 1.6Hz, 6"-H), 6.83 (1H, d, *J*=8.2Hz, 5"H), 7.03 (1H, d, *J*=8.2Hz, 6-H), 7.26 (1H, dd, *J*=8.2Hz, 5-H), 7.60 (2H, dd, *J*=8.2, 2.0Hz, 3'-, 5'-H), 8.19 (1H, d, *J*=8.7Hz, 4-H), 8.31 (2H, dd, *J*=8.2, 2.0Hz, 2'-, 6'-H), 8.72 (1H, s, isoxazole-H), 11.41 (1H, bs, NHCO-isoxazole) | 541(0.54), 164(100.00) | C35H33N3O8 C;67.41(67.39),H;5.30(5.28), N;6.74 (6.54) | |
| --- | --- | --- | --- | --- | --- | --- | --- | --- | --- | --- | --- | --- | --- | --- | --- | --- | --- | --- | --- | --- | --- | --- | --- | --- | --- | --- | --- | --- | --- | --- | --- | --- | --- | --- | --- | --- | --- | --- | --- | --- | --- | --- | --- | --- | --- | --- | --- | --- |

**Table S-6 Yields, Melting Points, 1H-NMR Data and Mass Spectral Data of 15**

| | Compd. | Yield  (%) | mp  (°C ） | 1H-NMR | MS *m/z*(int.) | formula HR-MS*m/z*M+ Calcd(Found) or Analysis Calcd(Found) | | --- | --- | --- | --- | --- | --- | | **15a** | 22.6 | 206.1-208.1 | (CDCl3), 2.41 (3H, s, CH3), 2.64 (3H, s, COCH3), 7.32 (1H, dd, *J*=6.6, 1.6Hz, 5- or 6-H), 7.50 (1H, d, *J*=7.7Hz, 7-H), 7.54 (1H, dd, *J*=6.7, 1.0Hz, 5- or 6-H), 8.43 (1H, d, *J*=8.2Hz, 4-H), 10.97 (1H, bs, NH), 15.25 (1H, bs, OH) | 284(M+,77.97), 175(100.00) | C15H12N2O4 284.0797 (284.0796) | | **15b** | 87.0 | 221.9-222.4 | (CDCl3), 2.41 (3H, s, CH3), 2.63 (3H, s, COCH3), 7.39 (1H, d, *J*=8.7Hz, 7-H), 7.63 (1H, dd, *J*=8.7, 2.0Hz, 6-H), 8.63 (1H, d, *J*=2.0Hz, 4-H), 10.91 (1H, bs, NH), 15.09 (1H, bs, OH) | 362(M+,54.17), 253(100.00) | C15H11BrN2O4 361.9902 (361.9902) | | **15c** | 20.1 | 216.0-218.0 | (CDCl3), 2.44 (3H, s, CH3), 2.66 (3H, s, COCH3), 7.61 (1H, d, *J*=9.2Hz, 7-H), 7.78 (1H, dd, *J*=8.9, 1.5Hz, 6-H), 8.95 (1H, d, *J*=1.1Hz, 4-H), 10.98 (1H, bs, NH), 14.94 (1H, s, OH) | 309(M+,36.06), 200(100.00) | C16H11N4O3 309.0750 (309.0752) | | **15d** | 30.3 | 175.1-178.4 | (CDCl3), 2.40 (3H, s, CH3), 2.59 (3H, s, COCH3), 3.90 (3H, s, OCH3), 6.93-6.96 (2H, m, 5-, 7-H), 8.36 (1H, d, *J*=9.7Hz, 4-H), 11.14 (1H, bs, NH), 15.26 (1H, s, OH) | 314(M+,29.70), 43(100.00) | C16H14N2O5 314.0903 (314.0895) | | **15e** | 74.0 | 207.2-208.9 | (CDCl3), 2.40 (3H, s, CH3), 2.66 (3H, s, COCH3), 4.03 (3H, s, OCH3), 7.00 (1H, d, *J*=7.1Hz, 6-H), 7.22 (1H, d, *J*=8.3Hz, 5-H), 7.95 (1H, d, *J*=8.4Hz, 4-H), 10.89 (1H, bs, NH), 15.24 (1H, s, OH) | 314(M+,71.40), 205(100.00) | C16H14N2O5 314.0903 (314.0895) | | **15g** | 82.1 | 269.3-271.2 | (DMSO-*d*6), 2.19 (3H, s, CH3), 7.61 (1H, d, *J*=8.7Hz, 7-H), 7.71 (1H, dd, *J*=8.7, 2.0Hz, 6-H), 8.05 (2H, m, 2'-, 6'-H or 3'-, 5'-H), 8.16 (2H, m, 2'-, 6'-H or 3'-, 5'-H), 8.66 (1H, d, *J*=2.1Hz, 4-H), 12.53 (1H, bs, NH) | 449(M+,55.84), 340(100.00) | C21H12BrN3O4 449.0011 (449.0009) | | **15h** | 98.0 | 263.3-265.3 | (CDCl3), 2.44 (3H, s, CH3), 7.44 (1H, d, *J*=8.7Hz, 7-H), 7.53 (2H, dd, *J*=8.5, 2.0Hz, 3'-, 5'-H), 7.65 (1H, dd, *J*=8.6, 2.0Hz, 6-H), 8.25 (2H, dd, *J*=8.7, 2.6Hz, 2'-, 6'-H), 8.64 (1H, d, *J*=2.0Hz, 4-H), 11.37 (1H, s, NH), 15.12 (1H, s, OH) | 458(M+,11.32), 350(100.00) | C20H12BrClN2O4 457.9669 (457.9662) | | **15j** | 70.0 | 131.7-133.4 | (CDCl3), 2.45 (3H, s, CH3), 3.50 (3H, s, OCH3), 6.88-8.33 (7H, m, 4-, 5-, 6-H, 2'-, 3'-, 5'-, 6'-H), 11.32 (1H, s, NH), 15.20 (1H, bs, OH) | 454(M+,19.88), 346(100.00) | C21H15BrN2O5 454.0164 (454.0160) | | **15k** | 90.0 | 165.8-167.2 | (CDCl3) 2.41 (3H, s, CH3), 7.39 (1H, m, 5- or 6-H), 7.53 (1H, d, *J*=7.6Hz, 7-H), 7.54 (1H, m, 5- or 6-H), 7.66 (1H, d, *J*=7.7Hz, 4-H), 8.05 (1H, s, NH), 14.87 (1H, s, OH) | 267(M+,46.57), 158(100.00) | C13H9N3O3 267.0644 (267.0636) | | **15l** | 21.0 | 206.3-208.3 | (CDCl3) 2.43 (3H, s, CH3), 7.42 (1H, d, *J*=8.8Hz, 7-H), 7.65 (1H, dd, *J*=9.2, 2.1Hz, 6-H), 7.85 (1H, d, *J*=1.6Hz, 4-H), 8.05 (1H, s, NH), 14.87 (1H, s, OH) | 281(M+,32.72), 149(100.00) | C14H11NO4 281.0688 (281.0689) | | **15m** | 64.1 | 358.0 (dec.) | (CDCl3) 2.39 (3H, s, CH3), 7.33 (1H, m, 5-, or 6-H), 7.46 (1H, m, 7-H), 7.49 (1H, m, 5- or 6-H), 8.38 (1H, d, *J*=8.3Hz, 4-H), 10.82 (1H, bs, NH), 15.33 (1H, s, OH) | 285(M+,33.21), 176(100.00) | C14H11N3O4 285.0750 (285.0753) | | **15n** | 12.0 | 147.5-150.1 | (CDCl3), 1.48 (3H, t, *J*=7.2Hz, CH2CH3), 2.41 (3H, s, CH3), 4.55 (2H, q, *J*=7.2Hz, CH2), 7.32 (1H, dd, *J*=8.2, 1.6Hz, 5-H or 6-H), 7.50 (2H, dd, *J*=8.2, 1.0Hz, 5- or 6-H), 7.54 (1H, dd, *J*=6.2, 1.5Hz, 7-H), 8.27 (1H, d, *J*=8.2Hz, 4-H), 9.92 (1H, s, NH), 15.27 (1H, s, OH) | 314(M+,59.04), 205(100.00) | C16H14N2O5 314.0889 (314.0875) | | **15o** | 78.7 | 186.3-187.2 | (CDCl3), 1.47 (3H, t, *J*=7.2Hz, CH2CH3), 2.42 (3H, s, CH3), 4.56 (2H, s, CH2), 7.41 (1H, d, *J* =9.2Hz, 7-H), 7.59 (1H, dd, *J*=8.7, 2.1Hz, 6-H), 8.46 (1H, d, *J*=2.1Hz, 4-H), 9.89 (1H, bs, NH), 15.11 (1H, bs, OH) | 392(M+,69.82), 283(100.00) | C16H13BrN2O5 392.0008 (392.0002) | | **15p** | 60.0 | 212.2-213.1 | (CDCl3), 2.41 (3H, s, CH3), 7.32-7.36, 7.51-7.56 (3H, m, 4-, 5-, 6-, 7-H), 8.33 (1H, dd, *J*=8.2Hz, 4-H), 9.99 (1H, bs, NH), 15.22 (1H, bs, OH) | 286(M+,67.08), 177(100.00) | C14H10N2O5 286.0590 (286.0591) | | **15q** | 80.0 | 169.3-171.0 | (CDCl3), 1.21 (6H, m, CH2CH3×2), 2.37 (3H, d, *J*=1.1Hz, CH=C-CH3), 2.41 (3H, s, CH3), 2.62 (3H, s, COCH3), 3.42-3.49 (2H, m, CH2), 6.34 (1H, d, *J*=1.1Hz, C=C-H), 7.48 (1H, d, *J*=8.7Hz, 7-H), 7.64 (1H, dd, *J*=8.7, 1.6Hz, 6-H), 8.54 (1H, d, *J*=1.6Hz, 4-H), 10.99 (1H, bs, NH), 15.19 (1H, bs, OH) | 423(M+,21.78), 44(100.00) | C23H25N3O5 423.1794 (423.1794) | | **15r** | 44.9 | 176.7-179.7 | (CDCl3), 2.41 (3H, s, COCH3 or CH3), 2.59 (3H, d, *J*=1.0Hz, CH=C-CH3), 2.62 (3H, s, COCH3 or CH3), 2.84 (2H, t, *J*=7.2Hz, NHCH2CH2), 3.61 (2H, q, *J*=7.2Hz, NHCH2CH2), 3.85 (3H, s, OCH3), 3.87 (3H, s, OCH3), 5.60 (1H, bt, *J*=5.7Hz, CONHCH2), 5.97 (1H, d, *J*=1.0Hz, C=C-H), 6.75-6.83 (3H, m, arom-H), 7.46 (1H, d, *J*=8.7Hz, 7-H), 7.59 (1H, dd, *J*=8.7, 2.1Hz, 6-H), 8.47 (1H, d, *J*=2.1Hz, 4-H), 10.96 (1H, bs, NHCO), 15.15 (1H, s, OH) | 531(M+,0.73), 164(100.00) | C24H26N2O5 501.2006 (501.2008)  Cont. | |
| --- | --- | --- | --- | --- | --- | --- | --- | --- | --- | --- | --- | --- | --- | --- | --- | --- | --- | --- | --- | --- | --- | --- | --- | --- | --- | --- | --- | --- | --- | --- | --- | --- | --- | --- | --- | --- | --- | --- | --- | --- | --- | --- | --- | --- | --- | --- | --- | --- | --- | --- | --- | --- | --- | --- | --- | --- | --- | --- | --- | --- | --- | --- | --- | --- | --- | --- | --- | --- | --- | --- | --- | --- | --- | --- | --- | --- | --- | --- | --- | --- | --- | --- | --- | --- | --- | --- | --- | --- | --- | --- | --- | --- | --- | --- | --- | --- | --- | --- | --- | --- | --- | --- |

**Table S-7** 13C-NMR of **14** and **15** (CDCl3)

| |  | **14b** | **14o** | **15b** | **15c** | **15o** | | --- | --- | --- | --- | --- | --- | | BF 2-C | 138.76 | 131.05 | 139.39 | 139.71 | 132.67 | | BF 3-C | 129.57 | 130.41 | 127.35 | 127.78 | 127.56 | | BF 3a-C | 122.48 | 122.67 | 122.35 | 121.27 | 122.70 | | BF 4-C | 130.28 | 129.42 | 129.61 | 133.35 | 128.74 | | BF 5-C | 116.52 | 116.47 | 116.70 | 108.09 | 116.65 | | BF 6-C | 133.02 | 132.27 | 132.78 | 133.35 | 132.07 | | BF 7-C | 113.68 | 113.66 | 113.85 | 113.84 | 113.87 | | BF 7a-C | 153.14 | 153.07 | 152.86 | 155.24 | 152.99 | | NHCO | 158.72 | 158.53 | 167.44 | 167.58 | 166.95 | | isoxazole-CH3 | 12.75 | 12.73 |  | - | - | | isoxazole-3-C | 148.60 | 148.40 | - | - | - | | isoxazole-4-C | 173.6 | 173.69 | - | - | - | | isoxazole-5-C | 111.72 | 111.68 | - | - | - | | C=C-CN | - | - | 81.52 | 81.53 | 81.21 | | C=C-CN | - | - | 189.04 | 189.38 | 188.97 | | C=C-CN | - | - | 115.33 | 115.18 | 115.52 | | C=C-CH3 | - | - | 22.4 | 22.10 | 22.04 | | COCH3 | 26.53 | - | 26.43 | 26.55 | - | | COCH3 | 192.90 | - | 192.57 | 192.54 | - | | CH2CH3 | - | 14.37 | - | - | 14.44 | | CH2CH3 | - | 62.11 | - | - | 62.45 | | COO | - | 161.82 | - | - | 160.55 | | CN | - | - | - | 118.55 | - | |
| --- | --- | --- | --- | --- | --- | --- | --- | --- | --- | --- | --- | --- | --- | --- | --- | --- | --- | --- | --- | --- | --- | --- | --- | --- | --- | --- | --- | --- | --- | --- | --- | --- | --- | --- | --- | --- | --- | --- | --- | --- | --- | --- | --- | --- | --- | --- | --- | --- | --- | --- | --- | --- | --- | --- | --- | --- | --- | --- | --- | --- | --- | --- | --- | --- | --- | --- | --- | --- | --- | --- | --- | --- | --- | --- | --- | --- | --- | --- | --- | --- | --- | --- | --- | --- | --- | --- | --- | --- | --- | --- | --- | --- | --- | --- | --- | --- | --- | --- | --- | --- | --- | --- | --- | --- | --- | --- | --- | --- | --- | --- | --- | --- | --- | --- | --- | --- | --- | --- | --- | --- | --- | --- | --- | --- | --- | --- | --- | --- | --- | --- | --- | --- | --- | --- | --- | --- | --- | --- | --- | --- | --- | --- | --- | --- |

BF : benzofuran ring

| | **15t** | 88.0 | 167.6-168.7 | (CDCl3), 2.36 (3H, d, *J*=0.92Hz, CH=C-CH3), 2.43 (3H, s, CH3), 2.65 (3H, s, COCH3), 3.17-3.25 (4H, m, piperazine-CH2×2), 3.72-3.76 (2H, m, piperazine-CH2), 3.88-3.92 (2H, m, piperazine-CH2), 6.35 (1H, d, *J*=0.92Hz, C=C-H), 6.89-6.97 (3H, m, arom-H), 7.26-7.32 (2H, m, arom-H), 7.51 (1H, d, *J*=8.7Hz, 7-H), 7.68 (1H, dd, *J*=8.7, 1.8Hz, 6-H), 8.56 (1H, d, *J*=1.8Hz, 4-H), 11.02 (1H, bs, NH), 15.18 (1H, bs, OH) | 512(M+,3.68), 132(100.00) | C29H28N4O5 512.2060 (512.2059) | | --- | --- | --- | --- | --- | --- | | **15u** | 76.7 | 219.5-222.8 | (CDCl3), 1.22 (6H, t, *J*=7.2Hz, CH2CH3×2), 2.38 (3H, d, *J*=1.1Hz, CH=C-CH3), 2.45 (3H, s, CH3), 3.40-3.53 (4H, m, CH2×2), 6.36 (1H, q, *J*=1.0Hz, C=C-H), 7.53 (1H, d, *J*=8.7Hz, 7-H), 7.71 (1H, dd, *J*=8.7, 1.5Hz, 6-H), 7.84-7.87 (2H, m, 2'-, 6'-H or 3'-, 6'-H), 8.36-8.39 (2H, m, 2'- ,6'-H or 3'-, 6'-H), 8.58 (1H, d, *J*=1.5Hz, 4-H), 11.38 (1H, bs, NH), 15.13 (1H, bs, OH), | 510(M+,0.10), 130(100.00) | C29H26N4O5 510.1903(510.1886) | | **15y** | 20.0 | 202.9-205.8 | (CDCl3), 2.43 (3H, s, CH3), 2.58 (3H, d, *J*=1.1Hz, CH=C-CH3), 2.84 (2H, t, *J*=7.1Hz, NHCH2CH2), 3.63 (2H, q, *J*=7.2Hz, NHCH2CH2), 3.86 (3H, s, OCH3), 3.88 (3H, s, OCH3), 4.02 (3H, s, 7-OCH3), 5.61 (1H, t, *J*=5.7Hz, CONHCH2), 6.04 (1H, d, *J*=1.0Hz, C=C-H), 6.76 (1H, d*, J*=2.0Hz, 2"-H), 6.77 (1H, dd, *J*=7.2, 2.0Hz, 6"-H), 6.83( 1H, d, *J*=8.2Hz, 5"-H), 7.02 (1H, d*, J*=8.2Hz, 6-H), 7.25 (1H, d, *J*=8.7Hz, 5-H), 7.58 (2H, d, *J*=8.7Hz, 3'-, 5'-H), 7.96 (1H, d, *J*=8.2Hz, 4-H), 8.34 (2H, d, *J*=8.7Hz, 2'-, 6'-H), 11.36 (1H, s, NHCO), 15.29 (1H, s, OH) | 609(0.05), 164(100.00) | C35H33N3O8 C;67.42(67.28) H;5.30(5.27) N;6.74 (6.73) | |
| --- | --- | --- | --- | --- | --- | --- | --- | --- | --- | --- | --- | --- | --- | --- | --- | --- | --- | --- |

**Table S-8** Yields, Melting Points, 1H-NMR Data and Mass Spectral Data of **16**

| | Compd. | Yield (%) | mp (°C ） | 1H-NMR | MS *m/z*(int.) | formula HR-MS*m/z*M+ Calcd(Found) | | --- | --- | --- | --- | --- | --- | | **16a** | 68.5 | 127.8-130.0 | (CDCl3), 1.97 (3H, dd, CH3, *J*=6.9, 1.8Hz), 2.59 (3H, s, COCH3), 6.10 (1H, dq, CH=CH(CH3), *J*=15.3, 1.5Hz), 7.08 (1H, dq, CH=CH(CH3), *J*=15.4, 6.9Hz), 7.33 (1H, d, 7-H, *J*=8.8Hz), 7.60 (1H, dd, 6-H, *J*=8.8, 2.2Hz), 8.84 (1H, d, 4-H, *J*=7.1Hz), 10.2 (1H, bs, NH) | 321(M+, 7.40), 69(100.00) | C14H12BrNO3 321.0001 (321.0000) | | **16b** | 65.7 | 153.8- 155.7 | (CDCl3), 1.96 (3H, dd, CH3 , *J*=6.5, 1.9Hz), 2.56 (3H, s, COCH3 ), 3.89 (3H, s, OCH3 ), 6.11 (1H, dq, CH=CH(CH3), *J*=15.4, 1.8Hz), 6.89-6.93 (2H, m, 5-, 6-H,), 7.05 (1H, dq, CH=CH(CH3), *J*=15.4, 7.0Hz), 8.56 (1H, dd, 4-H, *J*=8.8, 0.1Hz), 10.44(1H, bs, NH) | 273(M+, 13.1), 41(100.00) | C15H15NO4 273.1001 (273.1000) | | **16c** | 71.4 | 210.4- 212.8 | (CDCl3), 2.00 (3H, dd, CH3 , *J*=7.0, 1.8Hz), 6.17 (1H, dq, CH=CH(CH3), *J*=15.4, 1.5Hz), 7.13 (1H, qd, CH=CH(CH3), *J*=15.4, 6.7Hz), 7.37 (1H, d, 7-H, *J*=8.7Hz), 7.52-7.55 (2H, m, 3'-, 5'-H,), 7.63 (1H, dd, 6-H, *J*=9.0, 1.8Hz), 8.16-8.20 (2H, m, 2'-, 6'-H,), 8.8 7 (1H, d, 4-H, *J*=1.9Hz), 10.75 (1H, bs, NH) | 417(M+, 60.25), 69(100.00) | C19H13BrClNO4 416.9767 (416.9763) | | **16d** | 85.9 | 142.8-145.1 | (CDCl3), 1.19 (3H, dd, CH3, *J*=6.96, 1.83Hz), 6.08 (1H, dq, CH=CH(CH3), *J*=15.0Hz, 1.8Hz), 7.16 (1H, dq, CH=CH(CH3), *J*=15.0, 6.0Hz), 7.35 (1H, d, 7-H, *J*=8.8), 7.43 (1H, bs, NH), 7.60 (1H, dd, 6-H, *J*=8.8, 2.2Hz), 7.98 (1H, d, 4-H, *J*=2.5Hz) | 304(M+, 14.87), 69(100.00) | C13H9BrN2O2 303.1306 (303.9854) | | **16e** | 63.0 | 143.2-145.1 | (CDCl3), 1.47 (3H, t, CH2CH3, *J*=7.3Hz), 1.97 (3H, dd, CH=CHCH3, *J*=6.9, 1.8Hz), 4.46 (2H, q, CH2CH3, *J*=7.3Hz,), 6.11 (1H, dq, CH=CH(CH3), *J*=15.1, 1.8Hz), 7.06 (1H, dq, CH=CH(CH3), *J*=15.1, 6.9Hz), 7.29-7.84 (2H, m, 5-, 6-, 7-H,), 8.50 (1H, m, 4-H), 9.46 (1H, bs, NH) | 273(M+, 22.7), 69(100.00) | C15H15NO4 273.1001 (273.1000) | | **16f** | 67.5 | 180.2-181.1 | (CDCl3), 2.63(3H, s, COCH3), 6.69 (1H, d, CH=CH, *J*=15.4Hz), 7.36 (1H, d, 7-H, *J*=8.8Hz), 7.41-7.43 (3H, m, phenyl H), 7.59-7.63 (3H, m, 6-H and phenyl H), 6.84 (1H, d, CH=CH, *J*=15.8Hz), 8.91 (1H, d, 4-H, *J*=2.2Hz), 10.41 (1H, bs, NH) | 383(M+,23.59), 131(100.00) | C19H14NO3 383.0157 (383.0154) | | **16g** | 38.46 | 142.0-144.5 | (CDCl3), 2.58 (3H, s, COCH3), 3.90 (3H, s, OCH3), 6.69 (1H, d, CH=CH, *J*=15.8Hz), 6.91 (1H, d, 7-H, *J*=2.2Hz), 6.94 (1H, dd, 5-H, *J*=9.2, 2.6Hz), 7.26-7.43 (3H, m, phenyl H), 7.59-7.61 (2H, m, phenyl H,), 7.81 (1H, d, CH=CH, *J*=15.4Hz), 8.62 (1H, d, 4-H, *J*=9.2Hz), 10.64 (1H, bs, NH) | 335(M+,24.10), 131(100.00) | C20H17NO4 335.1058 (335.1058) | | **16h** | 59.1 | 171.2-171.8 | (CDCl3), 7.20 (1H, d, *J*=15.8Hz, CH=CH), 7.42-7.49 (3H, m, phenyl H), 7.63 (1H, d, 7-H, *J*=8.8Hz ), 7.65-7.68 (2H, m, 3’-,5’-H), 7.77 (1H, dd, *J*=8.8Hz, 6H), 7.78-7.82 (2H, m, phenyl H), 7.86 (1H, d, *J*=15.8Hz, CH=CH), 7.66 (2H, m, 2’-,6’-H), 8.87 (1H, d, *J*=9.2Hz , 4-H), 10.73 (1H, bs, NH) | 479(M+,23.23), 131(100.00) | C24H15BrClNO3 478.9927 (480.9879) | | **16i** | 59.0 | 240.2-242.0 | (CDCl3), 6.65 (1H, d, CH=CH, *J*=15.3Hz), 7.39 (1H, d, 7-H, *J*=8.8Hz), 7.43-7.44 (3H, m, phenyl H), 7.50 (1H, bs, NH) , 7.58-7.60 (2H, m, phenyl H), 7.63 (1H, dd, 6-H, *J*=9.1, 2.2Hz), 7.91 (1H, d, CH=CH, *J*=15.7Hz), 8.07 (1H, d, 4-H, *J*=2.2Hz) | 366(M+,4.37), 131(100.00) | C18H11BrN2O2 366.0004 (366.0003) | | **16j** | 70.4 | 162.4-163.8 | (CDCl3), 1.49 (3H, t, CH2CH3, *J*=7.0Hz), 4.51 (2H, q, CH2CH3, *J*=7.0Hz), 6.70 (1H, d, CH=CH, *J*=15.8Hz), 7.31 (1H, m, 5-,or 6-H,), 7.34-7.43 (3H, m, phenyl H,), 7.49-7.52 (2H, m, 7-H,and 5-,or 6H), 7.58-7.61 (2H, m, phenyl H), 7.83 (1H, d, CH=CH, *J*=15.7Hz), 8.56-8.58 (1H, m, 4-H), 9.68 (1H, bs, NH) | 335(M+,14.0), 131(100.00) | C20H17NO4 355.1157 (355.1156) | | **16k** | 54.0 | 197.8-200.2 | (CDCl3), 7.12 (1H, d, CH=CH, *J*=15.6Hz), 7.35 (1H, m, 5-,or 6-H), 7.43-7.48 (3H, m, phenyl H), 7.56-7.57 (2H, m, phenyl H), 7.74-7.76 (2H, m, 7-H, and 5-,or 6-H), 7.80 (1H, d, CH=CH, *J*=15.5Hz), 8.41-8.43 (1H, m, 4-H), 9.75 (1H, bs, NH) | 307(M+,12.7), 131(100.00) | C18H13NO4 307.0845　(307.0840) | |
| --- | --- | --- | --- | --- | --- | --- | --- | --- | --- | --- | --- | --- | --- | --- | --- | --- | --- | --- | --- | --- | --- | --- | --- | --- | --- | --- | --- | --- | --- | --- | --- | --- | --- | --- | --- | --- | --- | --- | --- | --- | --- | --- | --- | --- | --- | --- | --- | --- | --- | --- | --- | --- | --- | --- | --- | --- | --- | --- | --- | --- | --- | --- | --- | --- | --- | --- | --- | --- | --- | --- | --- | --- |

**Table S-9** Yields, Melting Points, 1H-NMR Data and Mass Spectral Data of **18**, **19**, **20**, **23**, **24**

| | Compd. | Yield (%) | mp (°C ) | 1H-NMR | MS *m/z*(int.) | formula  HR-MS*m/z*M+ Calcd(Found)  or Analysis  Calcd(Found) | | --- | --- | --- | --- | --- | --- | | **18a** | 61.4 | 94.5- 96.0 | (CDCl3), 2.63 (3H, s, COCH3), 4.02 (3H, s, OCH3), 6.94-7.48 (4H, m, 3-, 4-, 5-, 6-H) | 190(M+,68.20), 175(100.00) | - | | **18b** | 79.2 | 105.0-106.0 | (CDCl3), 1.27 (3H, t, *J*=7.0Hz, CH2CH3), 2.60 (3H, s, COCH3), 4.28 (2H, q, *J*=7.0Hz, CH2CH3), 4.90 (2H, s, OCH2), 6.78-7.35 (3H, m, 4-, 5-, 6-H), 7.50 (1H, s, 3-H) | 262(M+,100.00), 189(13.65) | C14H14O5 262.0041 (262.0845) | | **18c** | 62.4 | 47.4- 49.2 | (acetone-*d*6), 1.21 (3H, t, *J*=7.0Hz, CH2CH3), 2.00-2.75 (4H, m, CH2CH2 CH2), 2.60 (3H, s, COCH3), 4.15 (2H, q, *J*=7.0Hz, COOCH2CH3), 4.34 (2 H, t, *J*=7.0Hz, OCH2CH2), 7.04-7.45 (3H, m, 4-, 5-, 6-H), 7.74 (1H, s, 3-H) | 290(M+,15.51), 115(100.00) | C16H18O5 290.1154 (290.1153) | | **18d** | 67.1 | 183.4-186.4 | (DMSO-*d*6), 1.93 (3H, t, *J*=7.0Hz, CH2CH3), 2.60 (3H, s, COCH3),  2.73 (2H, q, *J*=7.0Hz, NHCH2CH3), 7.27 (1H, d, *J*=9.0Hz, 6-H),  7.82 (1H, d, *J*=9.0Hz, 5-H), 8.10 (1H, s, 3-H) | 297(M+,100.00), 253(92.82) | - | | **18e** | 49.3 | 94.1- 96.2 | (CDCl3), 1.05 (3H, t, *J*=7.0Hz, NCH2CH3 or OCH2CH3), 1.25 (3H, t, *J*=7.0Hz, NCH2CH3 or OCH2CH3), 2.10-2.55 (4H, m, OCH2CH2CH2), 2.60 (3H, s, COCH3), 2.88-3.10 (2H, m, NHCH2CH3), 4.15 (2H, q, *J*=7.0Hz, OCH2CH3), 4.30 (2H, t, *J*=7.0Hz, OCH2CH2), 7.03 (1H, d, *J*=8.0Hz, 6-H),7.86 (1H, d, *J*=8.0Hz, 5-H), 7.97 (1H, s, 3-H) | 397(M+,4.26),  115(100.00) | C18H23NO7S  C;54.40(54.42) H;5.83(6.12) N;3.52(3.97) | | **18f** | 71.6 | 67.2- 68.2 | (CDCl3), 1.81-2.97 (2H, ｍ, CH2CH2CH2), 2.60 (3H, s, COCH3), 3.80 (2H, ｔ, *J*=7.0Hz, CH2CH2CH2), 4.30 (2H, ｔ, *J*=7.0Hz, CH2CH2CH2), 6.72-7.80 (3Ｈ, ｍ, 4-, 5-, 6-H）, 7.42 (1Ｈ, ｓ, 3-H) | 252(M+,40.13),  176(100.00) | C13H13ClO3  252.0553 (252.0555) | | **19** | 77.9 | yellow powder | (DMSO-*d*6), 2.65 (3H, s, COCH3), 4.13 (3H, s, OCH3), 7.33 (1H, d, *J*=9.0Hz, 6-H), 8.17 (1H, s, 3-H), 8.33 (1H, d, *J*=9.0Hz, 5-H) | 235(M+,100.00), 189(12.71) | - | | **20** | 42.5 | 147.0-149.0 | (DMSO-d6), 2.51 (3H, s, COCH3), 3.82 (3H, s, OCH3), 5.42 (2H, bs, NH2), 6.31 (1H, d, *J*=9.0Hz, 5- or 6-H), 6.87 (1H, d, *J*=9.0Hz, 5- or 6-H), 7.95 (1H, s, 3-H) | 205(M+,75.49), 190(100.00) | - | | **23a** | 64.0 | 127.8-128.1 | (CDCl3), 1.27 (3H, t, *J*=7.0Hz, CH2CH3), 2.32 (3H, s, CH3), 4.30 (2H, q, CH2CH3), 4.92 (3H, s, OCH3), 6.67-7.39 (4H, m, 3-, 4-, 5-, 6-H), 9.57 (1H, bs, OH) | 177(M+,100.00), 204(40.61) | - | | **23b** | 47.3 | 124.5-126.5 | (CDCl3), 1.18 (3H, t, *J*=7.0Hz, CH2CH3), 2.24 (3H, s, CH3), 1.95-2.70 (4H, m, CH2CH2COO), 4.10 (2H, q, *J*=7.0Hz, CH2CH3), 4.23 (2H, t, *J*=6.0Hz, OCH2CH2), 6.71-7.21 (4H, m, 3-, 4-, 5-, 6-H), 9.65 (1H, bs, OH) | 305(M+,25.33), 115(100.00) | - | | **23c** | 70.1 | 200.1-205.7 | (CDCl3), 0.95 (3H, t, *J*=7.0Hz, CH2CH3), 2.21 (3H, s, CH3), 2.43-3.00 (2H, m, CH2CH3), 4.04 (3H, s, OCH3), 7.08 (1H, d, *J*=9.0Hz, 5-H), 7.50 (1H, s, 3-H), 7.67 (1H, d, *J*=9.0Hz, 6-H) | 312(M+,87.29), 205(100.00) | - | | **23d** | 94.2 | 156.4-157.5 | (DMSO-*d*6), 0.88-1.25 (6H, m, NHCH2CH3, COOCH2CH3), 2.23 (3H, s, CH3), 2.00-2.89 (4H, m, OCH2CH2CH2), 2.00-2.89 (2H, m, NHCH2CH3), 2.00-2.89 (1H, bs, NH), 4.12 (2H, q, COOCH2CH3), 4.31 (2H, t, *J*= Hz, OCH2CH2), 7.09 (1H, d, *J*=9.6Hz, 6-H), 7.53 (1H, s, 3-H), 7.68 (1H, d, *J*=8.4Hz, 5-H) | 412(M+,48.50), 115(100.00) | C18H24N2O7S  C;52.42(52.29) H;5.86(5.87) N;6.79(6.84) | | **23e** | 75.0 | 144.4-147.6 | (acetone-*d6*), 2.25 (3H, s, C(CH3)), 3.98 (3H, s, OCH3), 6.9-7.2 (4H, m, 3-, 4-, 5-, 6-H), 10.58 (1H, bs, N-OH) | 205(M+,100.00) | C11H11NO3 205.0739 (205.0743) | | **23f** | 90.5 | 160.7-163.0 | (acetone-*d6*), 2.26-2.41 (5H, m, C(CH3), and CH2CH2CH2), 3.88 (2H, CH2CH2CH2, *J*=6.22Hz), 4.31 (2H, CH2CH2CH2, *J*=5.86Hz), 7.07-7.2４ (4H, m, 4-, 5-, 6-H), 7.81 (1H, s, 3-H) | 267(M+,99.1) 191(100.00) | C13H14ClNO3 267.0662 (267.0665)  Cont. | |
| --- | --- | --- | --- | --- | --- | --- | --- | --- | --- | --- | --- | --- | --- | --- | --- | --- | --- | --- | --- | --- | --- | --- | --- | --- | --- | --- | --- | --- | --- | --- | --- | --- | --- | --- | --- | --- | --- | --- | --- | --- | --- | --- | --- | --- | --- | --- | --- | --- | --- | --- | --- | --- | --- | --- | --- | --- | --- | --- | --- | --- | --- | --- | --- | --- | --- | --- | --- | --- | --- | --- | --- | --- | --- | --- | --- | --- | --- | --- | --- | --- | --- | --- | --- | --- | --- | --- | --- | --- | --- | --- |

| **24a** | 81.0 | yellow oil | (CDCl3), 1.27 (3H, t, *J*=7.0Hz, CH2CH3), 1.51 (3H, d, *J*=7.0Hz, CHCH3), 4.26 (2H, q, *J*=7.0Hz, CH2CH3), 4.86 (2H, s, OCH2), 6.51-7.29 (4H, m, 3- ,4-, 5, 6-H) | 263(M+,62.34), 248(100.00) | - |
| --- | --- | --- | --- | --- | --- |
| **24b** | 93.2 | yellow oil | (CDCl3), 1.25 (3H, t, *J*＝7.1Hz, OCH2CH3), 1.52 (3H, d, *J*=6.4Hz, CHCH3), 1.76 (2H, s, NH2), 2.20 (2H, m, OCH2CH2CH2), 2.58 (2H, t, *J*=7.3Hz, OCH2CH2CH2), 4.15 (2H, q, *J*=7.3Hz, CH2CH3), 4.21 (1H, m, CHCH3), 4.24 (2H, t, *J*=12.8Hz, OCH2CH2CH2), 6.48 (1H, s, 2-H), 6.76 (1H, dd, *J*=7.4, 1.9Hz, 4-H), 7.08 (1H, m, 5-H), 7.10 (1H, dd, *J*=6.9, 1.8Hz, 6-H) | 291(M+,32.41), 115(100.00) | - |
| **24c** | 51.8 | colorless powder | (CDCl3), 1.06 (3H, t, *J*=6.9Hz, CH2CH3), 1.56 (3H, d, *J*=6.7Hz, CHCH3), 2.97 (2H, m, NHCH2CH3), 4.06 (3H, s, OCH3), 6.81 (1H, d, *J*=8.8Hz, 6-H), 6.96 (1H, s, 3-H), 7.71 (1H, d, *J*=8.4Hz, 5-H) | 298(M+,33.75), 283(100.00) | C13H18N2O4S 298.0988 (298.0988) |
| **24d** | 97.4 | colorless powder | (CDCl3), 0.95 (3H, t, *J*=7.3Hz, NHCH2CH3), 1.18 (3H, t, *J*＝7.3Hz, OCH2CH3), 1.64 (3H, d, *J*=6.4Hz, CHCH3), 2.07 (2H, m, OCH2CH2CH2), 2.51 (2H, t, *J*=7.0Hz, OCH2CH2CH2), 2.78 (2H, m, NHCH2CH3), 4.08 (2H, q, *J*=7.3Hz, OCH2CH3), 4.31 (2H, t, *J*=6.5Hz, OCH2CH2CH2), 4.75 (1H, m, CHCH3), 7.15 (1H, dd, *J*=8.4Hz, 6-H), 7.32 (1H, s, 3-H), 7.65 (1H, d, *J*=8.4Hz, 5-H) | 398(M+,38.41), 115(100.00) | C18H26N2O6S 398.1512 (398.1516) |

**Table S-10** Yields, Melting Points, 1H-NMR Data and Mass Spectral Data of **21**, **22**, **25**, **26**, **27**

| | Compd. | Yield (%) | mp (°C ） | 1H-NMR | MS *m/z*(int.) | formula HR-MS*m/z*M+ Calcd(Found)  or Analysis  Calcd(Found) | | --- | --- | --- | --- | --- | --- | | **21** | 16.9 | 201.8-205.9 | (CDCl3), 2.62 (3H, s, CH3), 2.78 (3H, s, COCH3), 4.03 (3H, s, OCH3), 6.92 (1H, d, *J*=8.5Hz, 6-H), 7.44 (1H, d, *J*=8.4Hz, 5-H), 7.52 (1H, s, 3-H), 7.62 (1H, bs, NH), 8.51 (1H, s, isoxazole-H) | 314(M+,59.42), 205(100.00) | C16H14N2O5 C;61.14(61.02) H;4.49(4.32) N;8.91(8.80) | | **22** | 80.0 | 243.4-246.4 | (CDCl3), 2.39 (3H, s, CH3 or COCH3), 2.64 (3H, s, CH3 or COCH3), 4.04 (3H, s, OCH3), 6.93 (1H, d, *J*=8.7Hz, 5- or 6-H), 7.35 (1H, d, *J*=8.7Hz, 5- or 6-H), 7.45 (1H, s, 3-H), 7.69 (1H, bs, NH), 15.46 (1H, bs, OH) | 314(M+,70.71), 205(100.00) | C16H14N2O5 314.0903 (314.0903) | | **25a** | 27.4 | 85.6-87.6 | (DMSO-*d*6), 1.57 (3H, d, *J*=7.2Hz, CHCH3), 2.64 (3H, s, isoxazole-CH3), 4.84 (2H, s, OCH2), 5.33 (1H, q, *J*=7.1Hz, CHCH3), 6.77 (1H, s, 3-H), 6.78 (1H, d, *J*=7.2Hz, 6-H), 7.10 (1H, t, *J*=8.2Hz, 4-H), 7.16 (1H, m, 5-H), 8.75 (1H, d, *J*=8.2Hz, NHCO), 8.96 (1H, s, isoxazole-H） | 344(M+,5.62), 262(100.00) | C17H16N2O6 344.1008 (344.1010) | | **25b** | 55.6 | 86.0-89.0 | (CDCl3), 1.22 (3H, t, *J*=7.0Hz, NHCH2CH3), 1.64 (3H, s, CHCH3), 2.00-2.70 (4H, m, CH2CH2COO), 2.72 (1H, s, isoxazole-CH3), 4.13 (2H, q, *J*=7.0Hz, NHCH2CH3), 4.22 (2H, t, *J*=6.0Hz, OCH2CH2), 5.15-5.92 (1H, m, CHCH3), 6.64-7.34 (4H, m, 3-, 4-, 5-, 6-H), 8.56 (1H, s, isoxazole-H) | 400(M+,31.17), 115(100.00) | C21H24N2O6 400.1634 (400.1637) | | **25c** | 68.0 | 184.6-185.5 | (acetone-*d*6), 1.02 (3H, t, *J*=7.4Hz, CH2CH3), 1.65 (3H, s, CHCH3), 2.45 (0.49H, s, isoxazole-CH3), 2.45(2.36H, s, isoxazole-CH3), 2.90 (2H, m, NHCH2CH3), 4.07 (3H, s, OCH3), 5.54 (1H, m, CHCH3), 6.36 (1H, t, *J*=5.5Hz, SO2NHCH2), 7.03 (1H, d, *J*=8.5Hz, 6-H), 7.09(1H, s, 3-H), 7.67 (1H, d, *J*=8.8Hz, 7-H), 7.99+8.06 (1H, bd×2, *J*=7.7Hz×2, CHNHCO), 8.74 (0.80H, s, isoxazole-H), 9.13 (0.16H, s, isoxazole-H) | 407(M+,9.53), 298(100.00) | C18H21N3O6S 407.1151 (407.1151)  Cont. | |
| --- | --- | --- | --- | --- | --- | --- | --- | --- | --- | --- | --- | --- | --- | --- | --- | --- | --- | --- | --- | --- | --- | --- | --- | --- | --- | --- | --- | --- | --- | --- | --- | --- | --- | --- | --- | --- |

| | **25d** | 28.3 | 88.1-90.9 | (CDCl3), 1.05 (3H, t, *J*=7.2Hz, NHCH2CH3), 1.25 (3H, t, *J*=7.2Hz, OCH2CH3), 1.64(3H, d, *J*=7.2, CHCH3), 2.22 (2H, m, CH2CH2CH2), 2.57 (2H, t, *J*=8.0Hz, OCH2CH2CH2), 2.69 (3H, s, isoxazole-CH3), 3.48 (2H, q, *J*=7.2Hz, NHCH2CH3), 4.15 (2H, q, *J*=7.2Hz,OCH2CH3), 4.30 (2H, m, OCH2CH2), 4.72 (1H, t, *J*=6.2Hz, NHCH2CH3), 5.55 (1H, m, CHCH3), 6.64 (1H, d, *J*=8.2Hz, NHCO), 6.82 (1H, d, *J*=8.7Hz, 6-H), 7.08 (1H, s, 3-H), 7.67 (1H, d, *J*=8.7Hz, 5-H), 8.48 (1H, s, isoxazole-H) | 507(M+,2.09), 115(100.00) | C23H29N3O8S  C;54.43(54.13) H;5.76(5.77) N;8.28(8.27) | | --- | --- | --- | --- | --- | --- | | **26a** | 64.1 | 169.9-173.2 | (DMSO-*d*6), 1.56 (3H, d, *J=*6.9Hz, CHCH3), 2.23 (3H, s, CH3), 4.85 (2H, s, OCH2), 6.73 (1H, s, 3-H), 6.79 (1H, d, *J*=2.7Hz, 6-H), 7.10 (1H, m, 5-H), 7.17 (1H, d, *J*=2.8Hz, 4-H) | 344(M+,37.99), 219(100.00) | C17H16N2O6 344.1008 (344.1006) | | **26b** | 72.3 | 147.9-148.6 | (CDCl3), 1.67 (3H, d, *J=*6.6Hz, CHCH3), 2.15-2.30 (2H, m, CH2CH2CH2), 2.28 (3H, s, CH3), 2.64 (2H, m, CH2COOH), 4.27 (2H, m, OCH2), 5.42 (1H, m, CHCH3), 6.59 (1H, s, 3-H), 6.65 (1H, bd, *J*=8.2Hz, CHNHCO), 8.61 (1H, dd, *J*=7.2, 1.6Hz, 6-H), 7.09 (1H, d, *J*=7.7Hz, 5-H), 7.14 (1H, dd, *J*=7.6, 2.0Hz, 4-H), 15.83 (1H, s, OH) | 372(M+,47.38), 161(100.00) | C19H20N2O6 372.1321 (372.1314) | | **26c** | 40.0 | 164.9-165.5 | (acetone-*d*6), 1.02 (3H, t, *J*=7.2Hz, CH2CH3), 1.73 (3H, d, *J*=7.2Hz, CHCH3), 2.28 (3H, s, CH3), 2.91 (2H, m, CH2CH3), 4.07 (3H, s, OCH3), 5.51 (1H, m, CHCH3), 6.36 (1H, bt, *J*=5.6Hz, SO2NHCH2), 7.04 (1H, d, *J*=8.7Hz, 6-H), 7.12 (1H, s, 3-H), 7.69 (1H, d, *J*=8.2Hz, 5-H), 8.01 (1H, bs, CHNHCO ), 16.31 (1H, bs, OH) | 407(M+,8.05), 298(100.00) | C18H21N3O6S 407.1151 (407.1150) | | **26d** | 24.1 | 121.0-122.1 | (acetone-*d*6), 1.08 (3H, t, *J*=7.1Hz, NHCH2CH3), 1.27 (3H, t, *J*=7.7Hz, OCH2CH3), 1.68 (3H, d, *J*=6.4Hz, CHCH3), 2.24 (2H, m, CH2CH2CH2), 2.31(3H, s, C=C-CH3), 2.58 (2H, m, OCH2CH2CH2), 2.98 (2H, m, NHCH2CH3), 4.16 (2H, q, *J*=7.1Hz, CH2CH3), 4.25 (1H, t, J=5.8Hz, NHCH2CH3), 4.30(2H, t, J=6.4Hz, OCH2CH2CH2), 5.41 (1H, m, CHCH3), 6.24 (1H, d, *J*=8.3Hz, NHCO), 6.85 (1H, d, *J*=8.3Hz, 6-H), 7.04 (1H, s, 3-H), 7.70 (1H, d, *J*=8.3Hz, 5-H), 15.67 (1H, bs, OH) | 507(M+,2.15),  115(100.00) | C23H29N3O8S  C;54.43(54.07) H;5.76(5.72) N;8.28(8.25) | | **26e** | 44.7 | 169.3-170.2 | (acetone-*d*6), 1.07 (3H, t, *J*=7.2Hz, CH2CH3), 1.74 (3H, d, *J*=7.2Hz, CHCH3), 2.17 (2H, m, CH2CH2CH2), 2.28 (3H, s, CH3), 2.57 (2H, t, *J*=7.2Hz, OCH2CH2CH2), 2.90 (2H, m, NHCH2CH3), 4.39 (2H, t, *J*=6.7Hz, OCH2CH2CH2), 5.51 (1H, m, CHCH3), 6.35 (1H, d, *J*=6.1Hz, SO2NHCH2), 7.06 (1H, d, *J*=8.3Hz, 6-H), 7.13 (1H, s, 3-H), 7.67 (1H, d, *J*=8.7Hz, 5-H), 8.00 (1H, bs, NHCO), 10.57 (1H, bs, COOH), 16.13 (1H, bs, OH) | 479(M+,7.15), 284(100.00) | C21H25N3O8S  C;52.60(52.30) H;5.26(5.31) N;8.76 (8.60) | | **27a** | 49.6 | 128.7- 130.2 | (CDCl3), 1.60 (3H, d, CH(CH3), *J*=6.8Hz), 1.84 (3H, dd, CH=CH(CH3), *J*=6.9, 1.9Hz), 4.00 (3H, s, OCH3), 5.42 (1H, m, CH), 5.78 (1H, dq, CH=CH(CH3), *J*=15.2, 1.3Hz,), 5.84 (1H, bd, NH, *J*=7.3Hz), 6.57 (1H, s, 3-H), 6.78 (1H, dd, 4-,or 6-H, *J*=2.3, 6.9Hz), 6.86 (1H, qd, CH=CH(CH3), *J*=15.1, 6.9Hz,), 7.09-7.14 (2H, m, 5-H and 4-, or 6-H) | 259(M+,61.0), 69(100.00) | C15H17NO3 259.1208 (259.1212) | | **27b** | 31.0 | 104.7-107.0 | (CDCl3), 1.60 (3H, d, CH(CH3), *J*=7.0Hz), 1.85 (3H, dd, CH=CH(CH3), *J*=7.0, 1.8Hz), 2.32 (2H, m, CH2CH2CH2), 3.81 (2H, t, CH2CH2CH2, *J*=6.2Hz), 4.34 (2H, t, CH2CH2CH2, *J*=5.8Hz), 5.42 (1H, m, CH), 5.81 (1H, dq, CH=CH(CH3), *J*=15.2, 1.8Hz), 5.81 (1H, bs, NH), 6.56 (1H, s, 3-H), 6.70 (1H, dd, 4-,or 6-H, *J*=6.2, 2.6Hz), 6.87 (1H, qd, CH=CH(CH3), *J*=15.0, 6.9Hz), 7.07-7.13 (2H, m, 5-H and 4-,or 6-H) | 321(M+,27.3), 69(100.00) | C15H17NO3 321.8037 (321.1132) | | **27c** | 58.9 | 154.5-156.5 | (CDCl3), 1.66 (3H, d, CH(CH3), *J=*7.0Hz), 4.01 (3H, s, OCH3), 5.50 (1H, m, CH), 6.05 (1H, bd, NH, *J*=8.0Hz), 6.38 (1H, d, CH=CH, *J*=15.4Hz), 6.61 (1H, d, 3-H, *J*=0.8Hz), 6.79 (1H, m, 4-,or 6-H), 7.11-7.16 (2H, m, 5-H and 4-,or 6-H), 7.34-7.36 (3H, m, phenyl H), 7.47-7.50 (2H, m, phenyl H), 7.64 (1H, d, CH=CH, *J*=15.7Hz) | 321(M+,55.4), 131(100.00) | C20H19NO3 321.1365 (321.1365) | | **27d** | 52.1 | 137.2-139.7 | (CDCl3), 1.65 (3H, d, CH(CH3), *J*=7.0Hz), 2.33 (2H, m, CH2CH2CH2, *J*=6.2Hz), 3.82 (2H, t, CH2CH2CH2, *J*=6.5Hz), 4.35 (2H, t, CH2CH2CH2, *J*=5.9Hz), 5.50 (1H, m, CH), 6.01 (1H, bd, NH, *J*=8.0Hz), 6.40 (1H, d, CH=CH, *J*=15.4Hz), 6.61 (1H, d, 3-H, *J*=0.7Hz), 6.81 (1H, dd, 4-,or 6-H, *J*=6.6, 2.2Hz), 7.09-7.13 (2H, m, 5-H and 4-,or 6-H), 7.34-7.36 (3H, m, phenyl H), 7.48-7.51 (2H, m, phenyl H), 7.66 (1H, d, CH=CH, *J*=15.4Hz) | 383(M+,32.0), 131(100.00) | C22H22ClNO3 3283.1288 (383.1291) | |
| --- | --- | --- | --- | --- | --- | --- | --- | --- | --- | --- | --- | --- | --- | --- | --- | --- | --- | --- | --- | --- | --- | --- | --- | --- | --- | --- | --- | --- | --- | --- | --- | --- | --- | --- | --- | --- | --- | --- | --- | --- | --- | --- | --- | --- | --- | --- | --- | --- | --- | --- | --- | --- | --- | --- | --- | --- | --- | --- | --- | --- |
